# Supplementary material for: Technology Assisted Rehabilitation Patient Perception Questionnaire (TARPP-Q): development and implementation of an instrument to evaluate patients’ perception during training
Source: Springer Nature journal article supplement (doi:10.1186/s12984-023-01146-3), 2023-03-24
Supplement: MOESM1 [file 24672358]

**TARPP-Q**  
**(Technology-Assisted Rehabilitation Patient Perception Questionnaire - TARPP-Q)**

The questionnaire was developed to verify the degree of patient appreciation and engagement when assisted by a technological/robotic device for rehabilitation. There are no right or wrong answers; your opinion is very valuable for us.

|                                                                             | STRONGLY<br>DISAGREE | MILDLY<br>DISAGREE | MILDLY<br>AGREE | STRONGLY<br>AGREE |
|-----------------------------------------------------------------------------|----------------------|--------------------|-----------------|-------------------|
| <b>1. It was easy to understand the exercise as requested by the device</b> | 1                    | 2                  | 3               | 4                 |
| <b>2. It was easy to exercise with the device</b>                           | 1                    | 2                  | 3               | 4                 |
| <b>3. I enjoyed exercising with the device</b>                              | 1                    | 2                  | 3               | 4                 |
| <b>4. Movements (walking, use of arm) improved with the device</b>          | 1                    | 2                  | 3               | 4                 |

| <b>5. While exercising with the device, I felt:</b>        | STRONGLY<br>DISAGREE | MILDLY<br>DISAGREE | MILDLY<br>AGREE | STRONGLY<br>AGREE |
|------------------------------------------------------------|----------------------|--------------------|-----------------|-------------------|
| 5A. Comfortable                                            | 1                    | 2                  | 3               | 4                 |
| 5B. Uncomfortable                                          | 1                    | 2                  | 3               | 4                 |
| 5C. Clumsy                                                 | 1                    | 2                  | 3               | 4                 |
| 5D. Amused                                                 | 1                    | 2                  | 3               | 4                 |
| 5E. Awkward                                                | 1                    | 2                  | 3               | 4                 |
| 5F. Stressed                                               | 1                    | 2                  | 3               | 4                 |
| <b>6. While exercising with the device, I experienced:</b> | STRONGLY<br>DISAGREE | MILDLY<br>DISAGREE | MILDLY<br>AGREE | STRONGLY<br>AGREE |
| 6A. Discomfort                                             | 1                    | 2                  | 3               | 4                 |
| 6B. Well-being                                             | 1                    | 2                  | 3               | 4                 |
| 6C. Fatigue                                                | 1                    | 2                  | 3               | 4                 |
| 6D. Poor control of my movements                           | 1                    | 2                  | 3               | 4                 |
| 6E. Better control of my movements                         | 1                    | 2                  | 3               | 4                 |

| <b>7. While exercising with the objects on the screen (exergames), I felt:</b> | STRONGLY<br>DISAGREE | MILDLY<br>DISAGREE | MILDLY<br>AGREE | STRONGLY<br>DISAGREE |
|--------------------------------------------------------------------------------|----------------------|--------------------|-----------------|----------------------|
| 7A. Comfortable                                                                | 1                    | 2                  | 3               | 4                    |
| 7B. Uncomfortable                                                              | 1                    | 2                  | 3               | 4                    |
| 7C. Clumsy                                                                     | 1                    | 2                  | 3               | 4                    |
| 7D. Amused                                                                     | 1                    | 2                  | 3               | 4                    |
| 7E. Awkward                                                                    | 1                    | 2                  | 3               | 4                    |
| 7F. Stressed                                                                   | 1                    | 2                  | 3               | 4                    |
| <b>8. Seeing the score reached on the screen (exergames):</b>                  | STRONGLY<br>DISAGREE | MILDLY<br>DISAGREE | MILDLY<br>AGREE | STRONGLY<br>AGREE    |
| 8A. Makes me feel more engaged                                                 | 1                    | 2                  | 3               | 4                    |
| 8B. Makes me feel under pressure                                               | 1                    | 2                  | 3               | 4                    |
| 8C. Aids me                                                                    | 1                    | 2                  | 3               | 4                    |
| 8D. Limits me                                                                  | 1                    | 2                  | 3               | 4                    |
| 8E. Makes me feel inadequate                                                   | 1                    | 2                  | 3               | 4                    |

|                                                                                           | STRONGLY<br>DISAGREE | MILDLY<br>DISAGREE | MILDLY<br>AGREE | STRONGLY<br>AGREE |
|-------------------------------------------------------------------------------------------|----------------------|--------------------|-----------------|-------------------|
| <b>9. Today, I am eager to exercise with the device</b>                                   | 1                    | 2                  | 3               | 4                 |
| <b>10. How would you describe your experience with the device to friends / relatives?</b> | STRONGLY<br>DISAGREE | MILDLY<br>DISAGREE | MILDLY<br>AGREE | STRONGLY<br>AGREE |
| 10A. With enthusiasm                                                                      | 1                    | 2                  | 3               | 4                 |
| 10B. Eager to return                                                                      | 1                    | 2                  | 3               | 4                 |
