# Supplementary material for: Technology Assisted Rehabilitation Patient Perception Questionnaire (TARPP-Q): development and implementation of an instrument to evaluate patients’ perception during training
Source: Springer Nature journal article supplement (doi:10.1186/s12984-023-01146-3), 2023-03-24
Supplement: MOESM2 [file 24672358]

**TARPP-Q**  
**(Technology-Assisted Rehabilitation Patient Perception Questionnaire - TARPP-Q)**

**Istruzioni:** Il presente questionario viene somministrato per verificare il grado di apprezzamento e di coinvolgimento del paziente trattato con un dispositivo riabilitativo. Non ci sono risposte giuste o sbagliate; per noi è importante conoscere la sua opinione.

|                                                                                   | PER NULLA | UN PO' | ABBASTANZA | MOLTO |
|-----------------------------------------------------------------------------------|-----------|--------|------------|-------|
| <b>1. E' stato facile capire il compito richiesto dal dispositivo</b>             | 1         | 2      | 3          | 4     |
| <b>2. E' stato facile eseguire gli esercizi con il dispositivo</b>                | 1         | 2      | 3          | 4     |
| <b>3. L'uso del dispositivo mi è piaciuto</b>                                     | 1         | 2      | 3          | 4     |
| <b>4. Il movimento (cammino, uso del braccio) è migliorato con il dispositivo</b> | 1         | 2      | 3          | 4     |

| <b>5. Nel lavorare con il dispositivo robotico mi sono sentito:</b> | PER NULLA | UN PO' | ABBASTANZA | MOLTO |
|---------------------------------------------------------------------|-----------|--------|------------|-------|
| 5A. A mio agio                                                      | 1         | 2      | 3          | 4     |
| 5B. A disagio                                                       | 1         | 2      | 3          | 4     |
| 5C. Impacciato                                                      | 1         | 2      | 3          | 4     |
| 5D. Divertito                                                       | 1         | 2      | 3          | 4     |
| 5E. Imbarazzato                                                     | 1         | 2      | 3          | 4     |
| 5F. Stressato                                                       | 1         | 2      | 3          | 4     |
| <b>6. Nel lavorare con il dispositivo robotico ho provato:</b>      | PER NULLA | UN PO' | ABBASTANZA | MOLTO |
| 6A. Fastidio                                                        | 1         | 2      | 3          | 4     |
| 6B. Benessere                                                       | 1         | 2      | 3          | 4     |
| 6D. Fatica                                                          | 1         | 2      | 3          | 4     |
| 6E. Poco controllo sui miei movimenti                               | 1         | 2      | 3          | 4     |
| 6F. Maggior controllo sui miei movimenti                            | 1         | 2      | 3          | 4     |

| <b>7. Nel lavorare con le cose viste sullo schermo (Realtà Virtuale) mi sono sentito:</b> | PER NULLA | UN PO' | ABBASTANZA | MOLTO |
|-------------------------------------------------------------------------------------------|-----------|--------|------------|-------|
| 7A. A mio agio                                                                            | 1         | 2      | 3          | 4     |
| 7B. A disagio                                                                             | 1         | 2      | 3          | 4     |
| 7C. Impacciato                                                                            | 1         | 2      | 3          | 4     |
| 7D. Divertito                                                                             | 1         | 2      | 3          | 4     |
| 7E. Imbarazzato                                                                           | 1         | 2      | 3          | 4     |
| 7F. Stressato                                                                             | 1         | 2      | 3          | 4     |
| <b>8. La possibilità di vedere il punteggio raggiunto durante l'esercizio:</b>            | PER NULLA | UN PO' | ABBASTANZA | MOLTO |
| 8A. Mi stimola ancora di più                                                              | 1         | 2      | 3          | 4     |
| 8B. Mi fa sentire sotto pressione                                                         | 1         | 2      | 3          | 4     |
| 8C. Mi agevola                                                                            | 1         | 2      | 3          | 4     |
| 8D. Mi ostacola                                                                           | 1         | 2      | 3          | 4     |
| 8E. Mi fa sentire inadeguato                                                              | 1         | 2      | 3          | 4     |

|                                                                              | PER NULLA | UN PO' | ABBASTANZA | MOLTO |
|------------------------------------------------------------------------------|-----------|--------|------------|-------|
| <b>9. Oggi ho voglia di venire a fare riabilitazione con il dispositivo:</b> | 1         | 2      | 3          | 4     |
| <b>10. Come descriveresti ai tuoi amici/familiari quest'esperienza?</b>      | PER NULLA | UN PO' | ABBASTANZA | MOLTO |
| 10A. Con entusiasmo                                                          | 1         | 2      | 3          | 4     |
| 10B. Con desiderio di ritornare                                              | 1         | 2      | 3          | 4     |
